# Supplementary material
Source: MDPI journal article supplement (https://www.mdpi.com/1424-8247/16/8/1183)

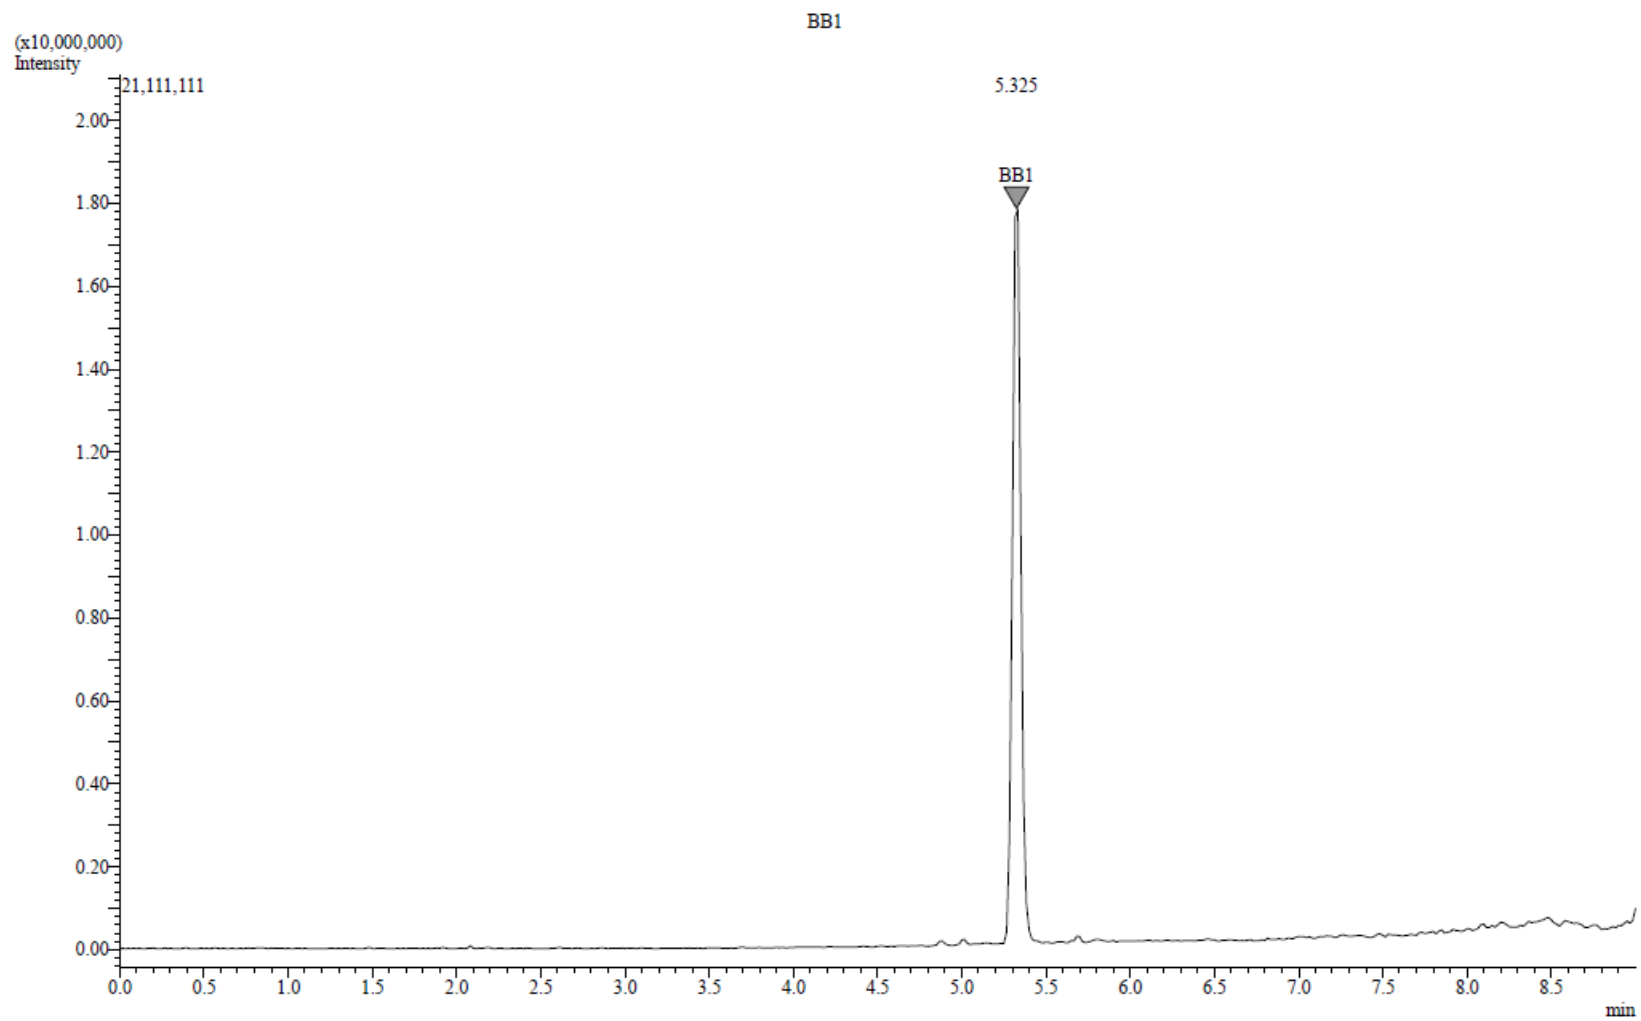

ID#: 1 R. Time: 5.317 (Scan#: 320)

MS Spectrum

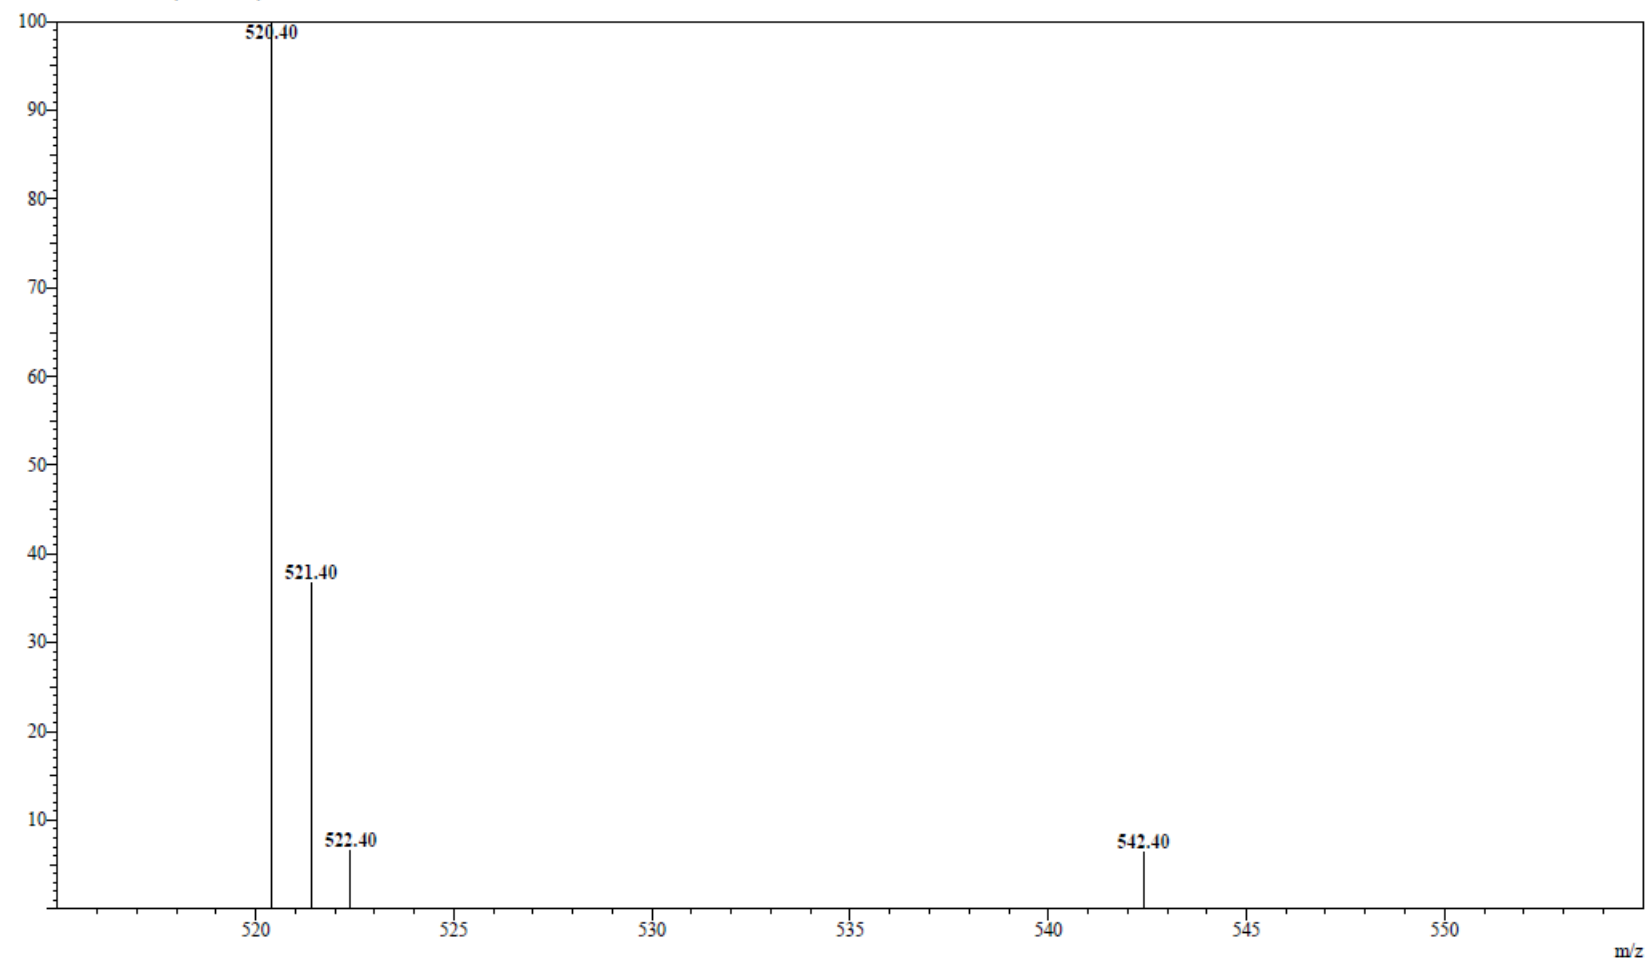

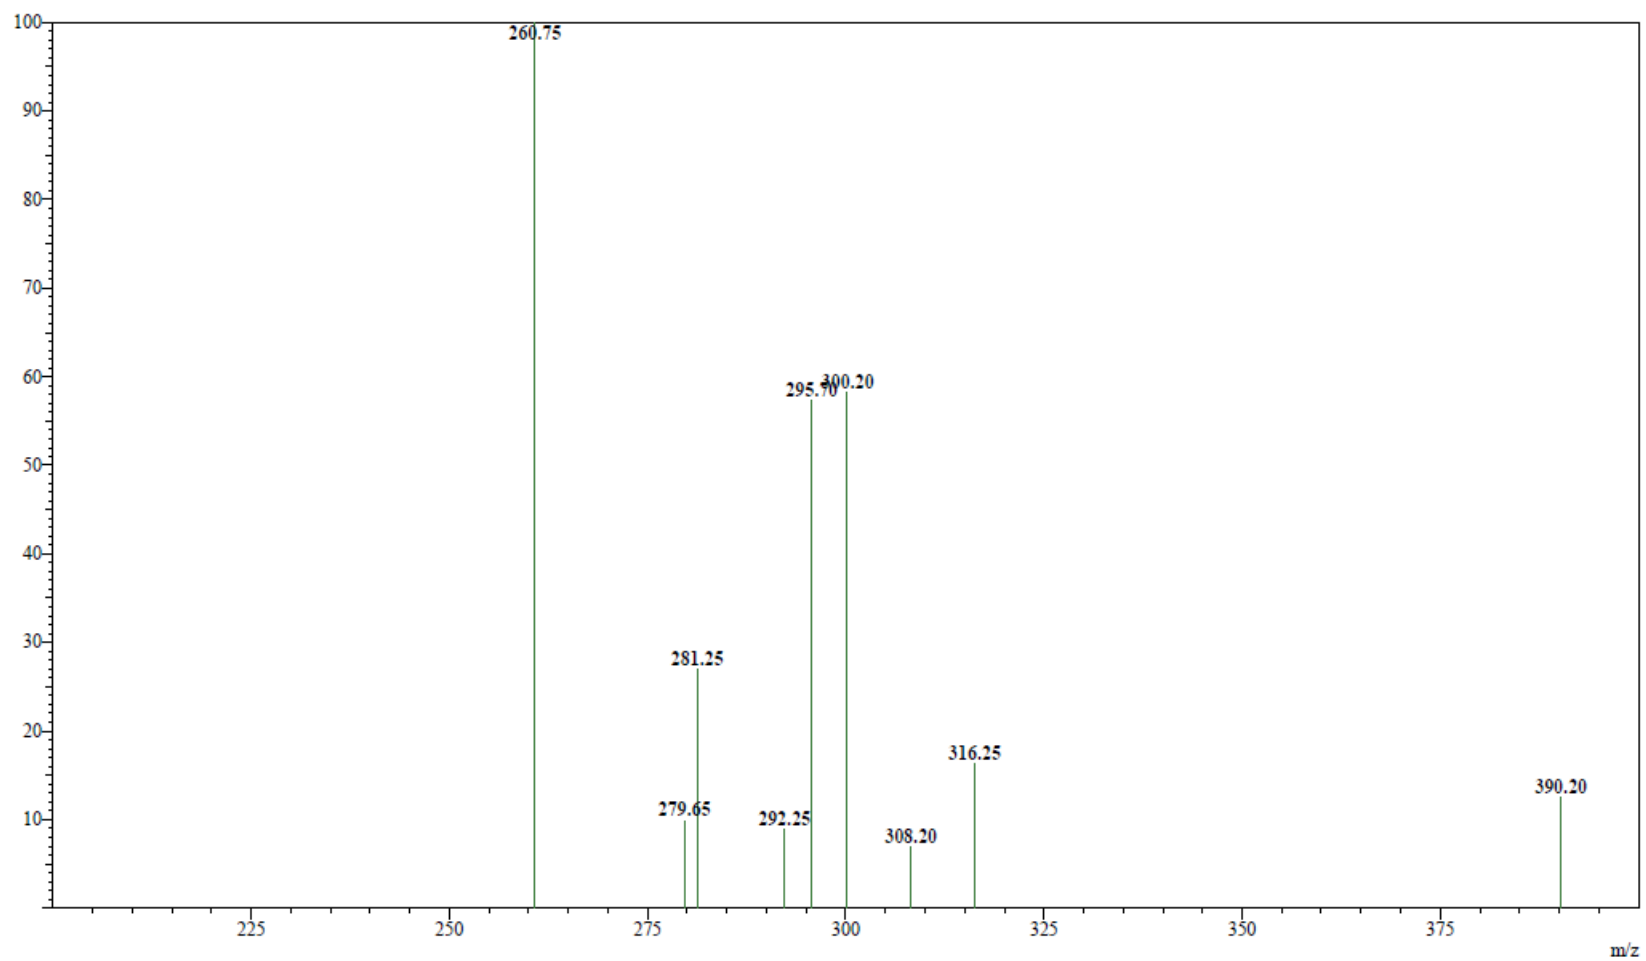

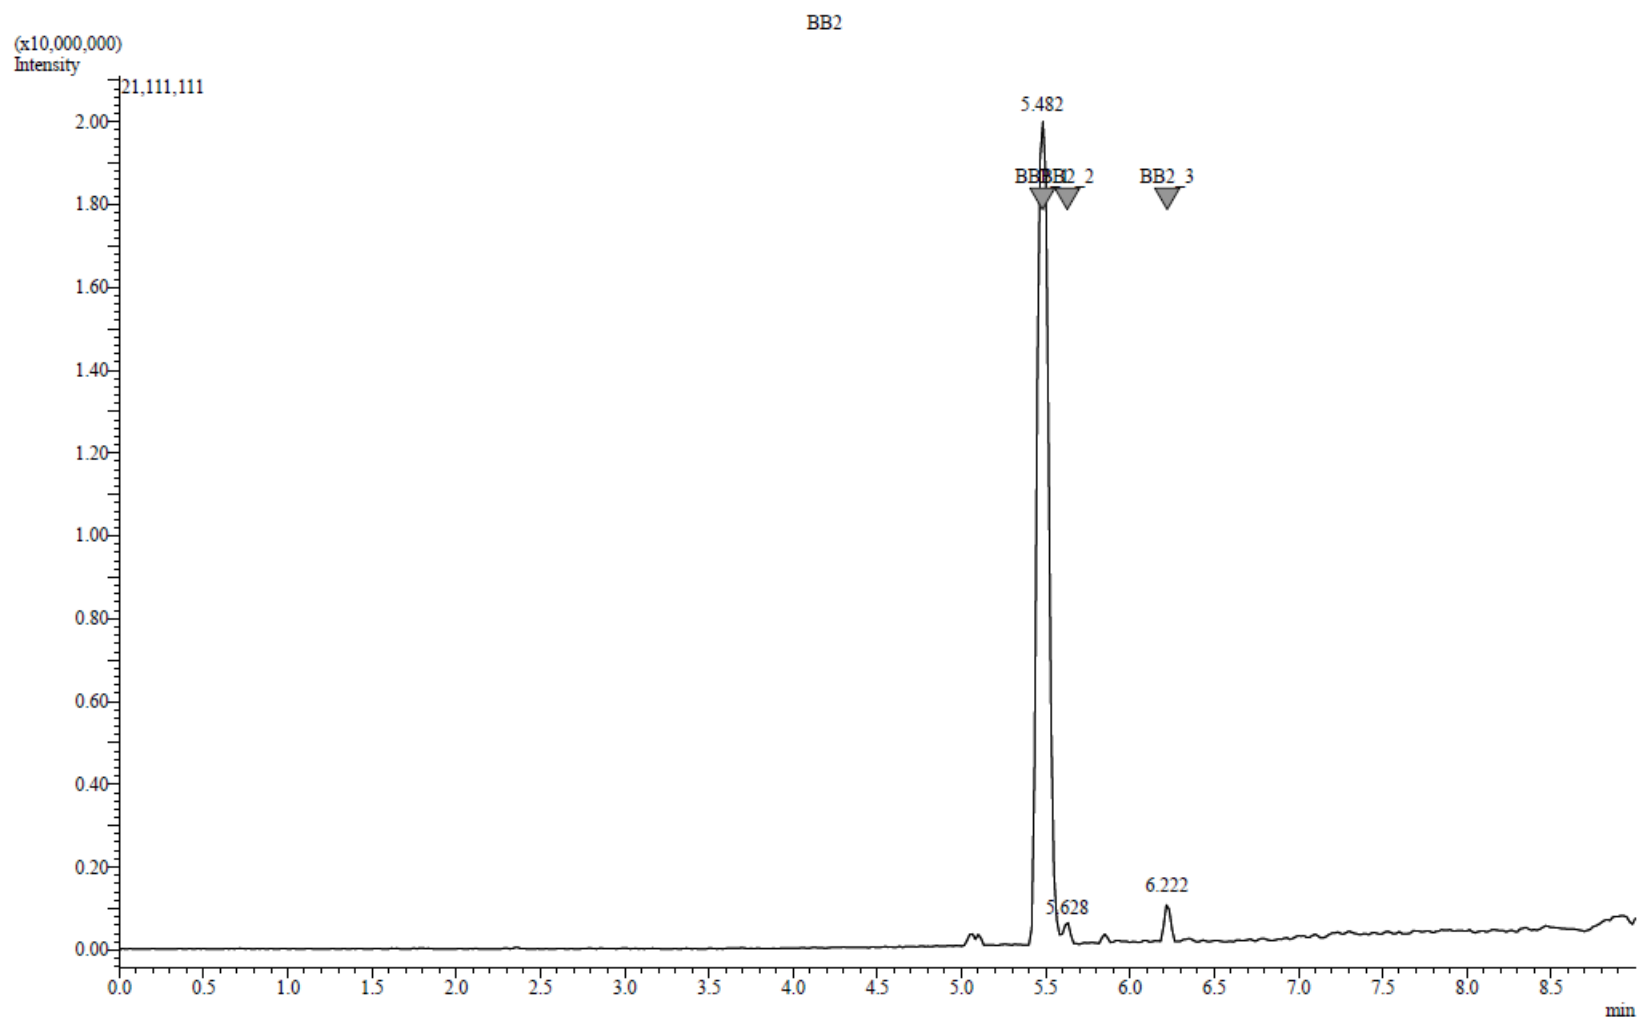

ID# 1 R. Time: 5.467 (Scan#: 329)

MS Spectrum

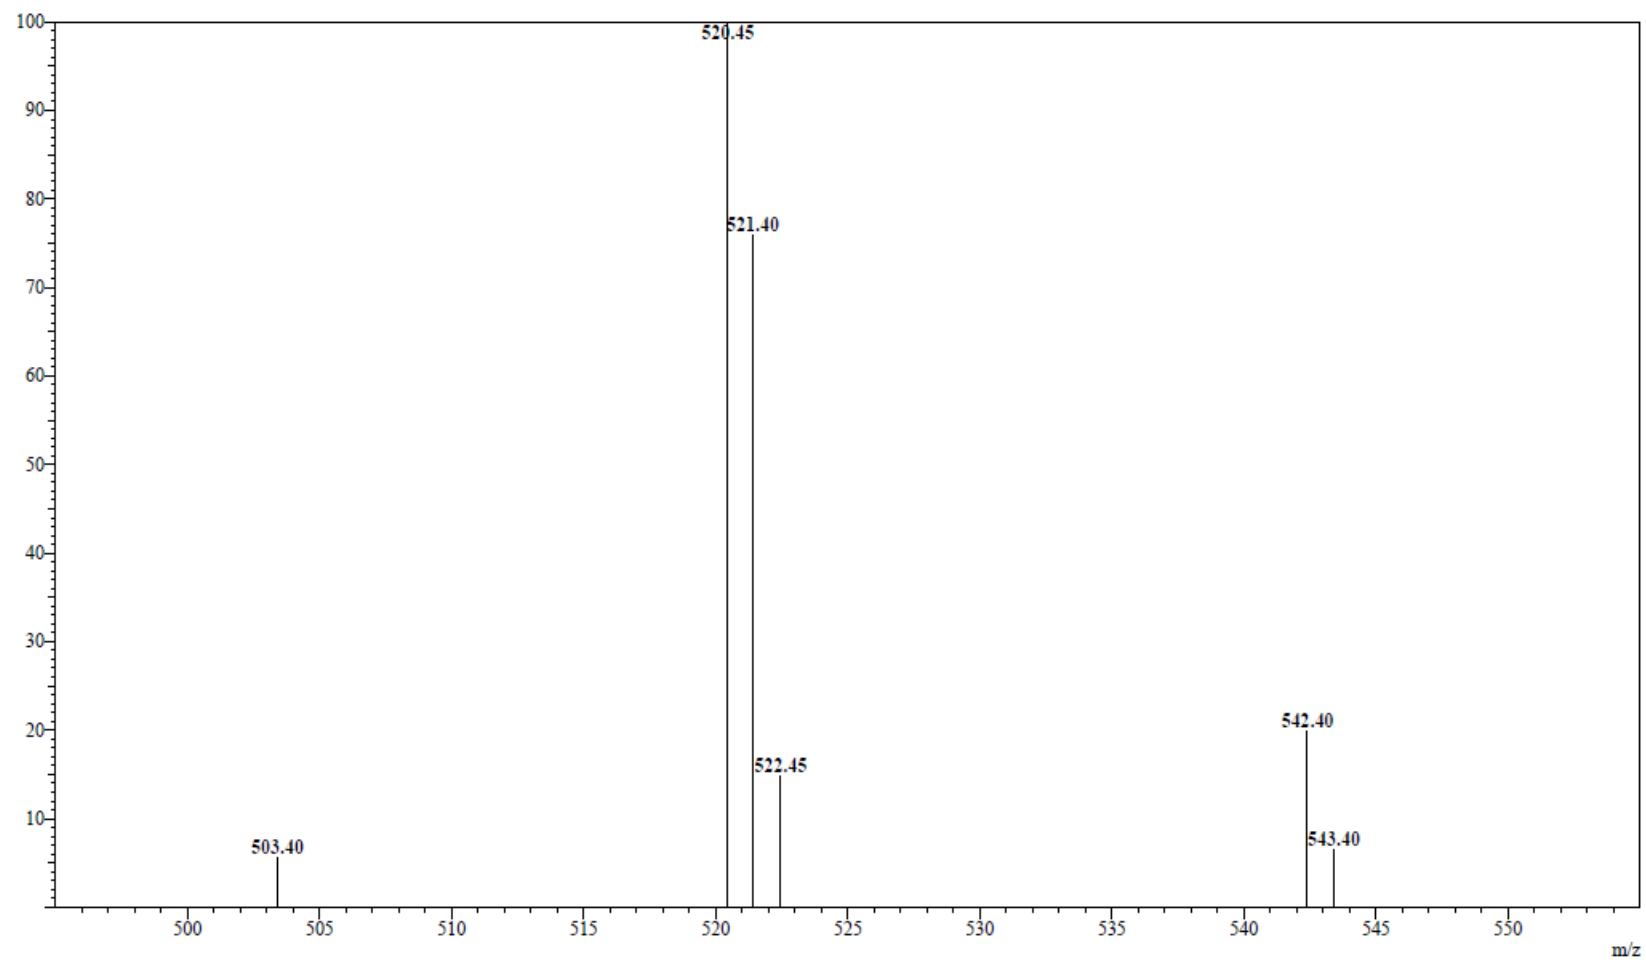

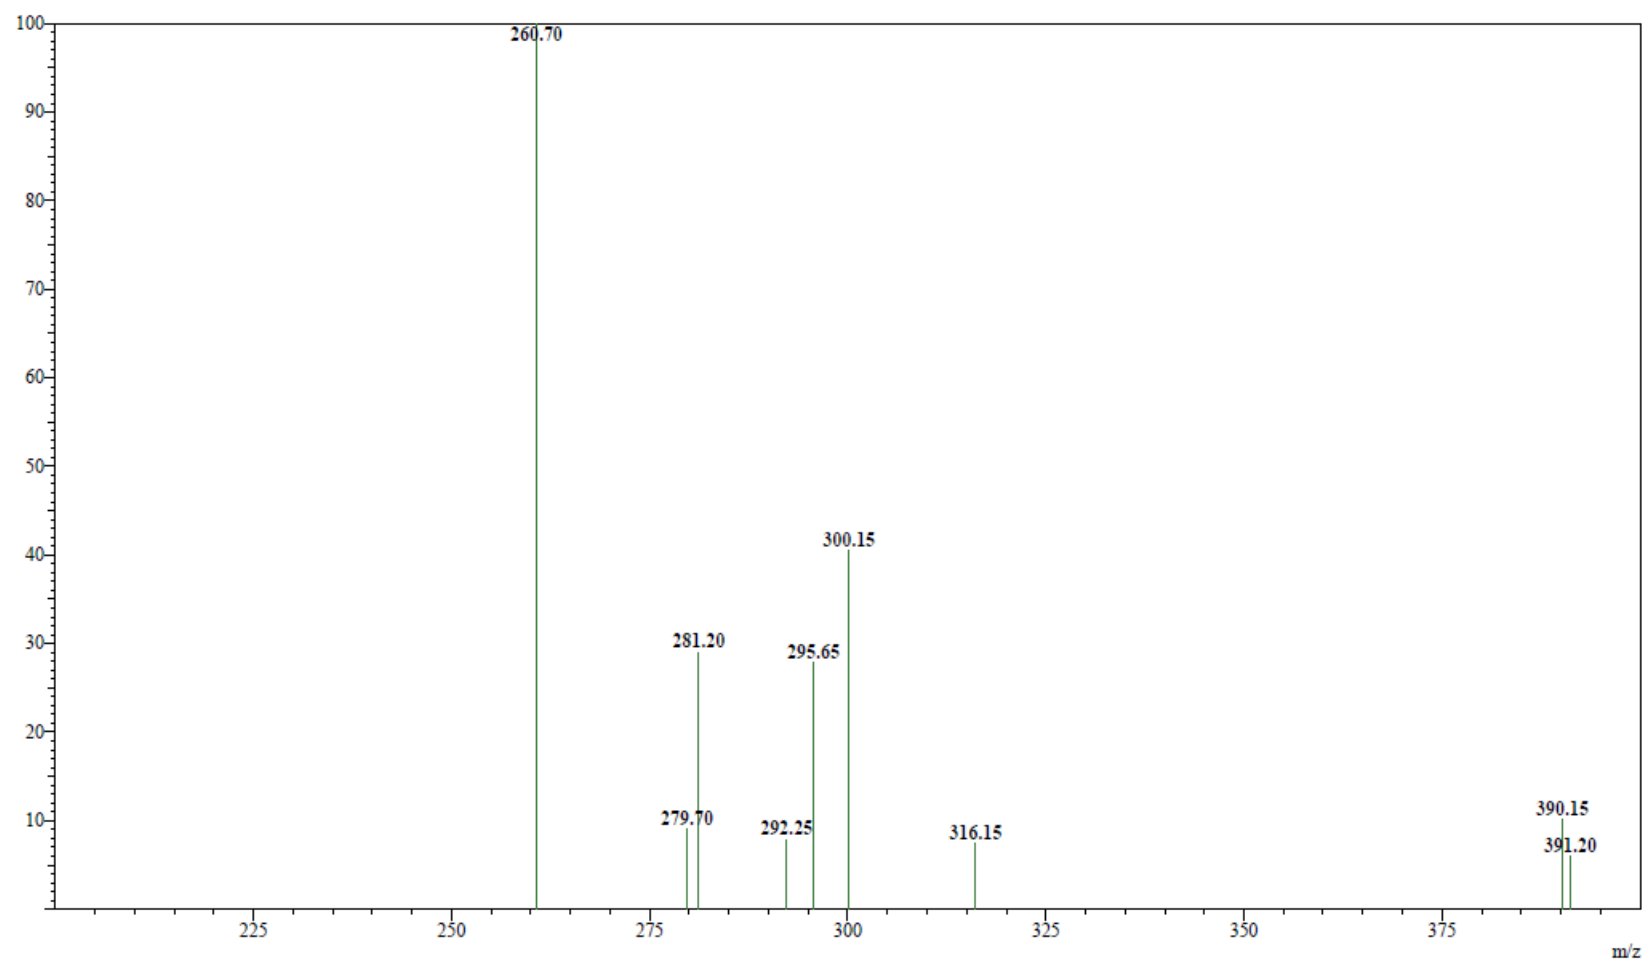

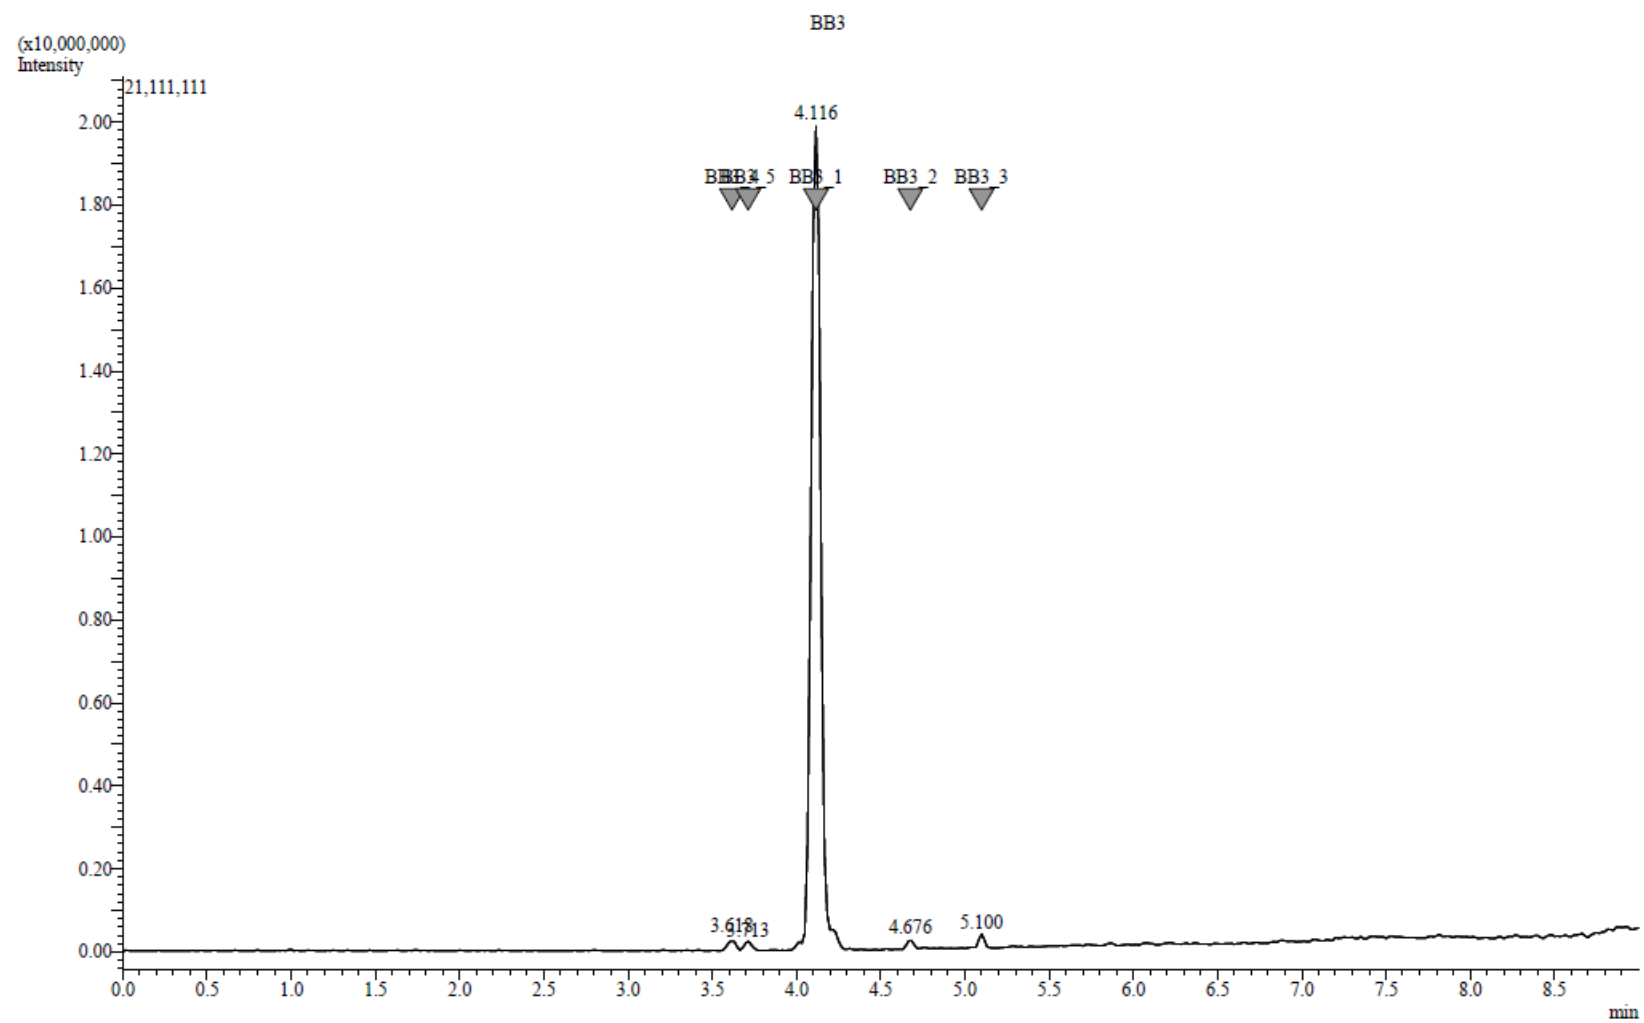

ID# 1 R.Time:4.100(Scan#:247)

MS Spectrum

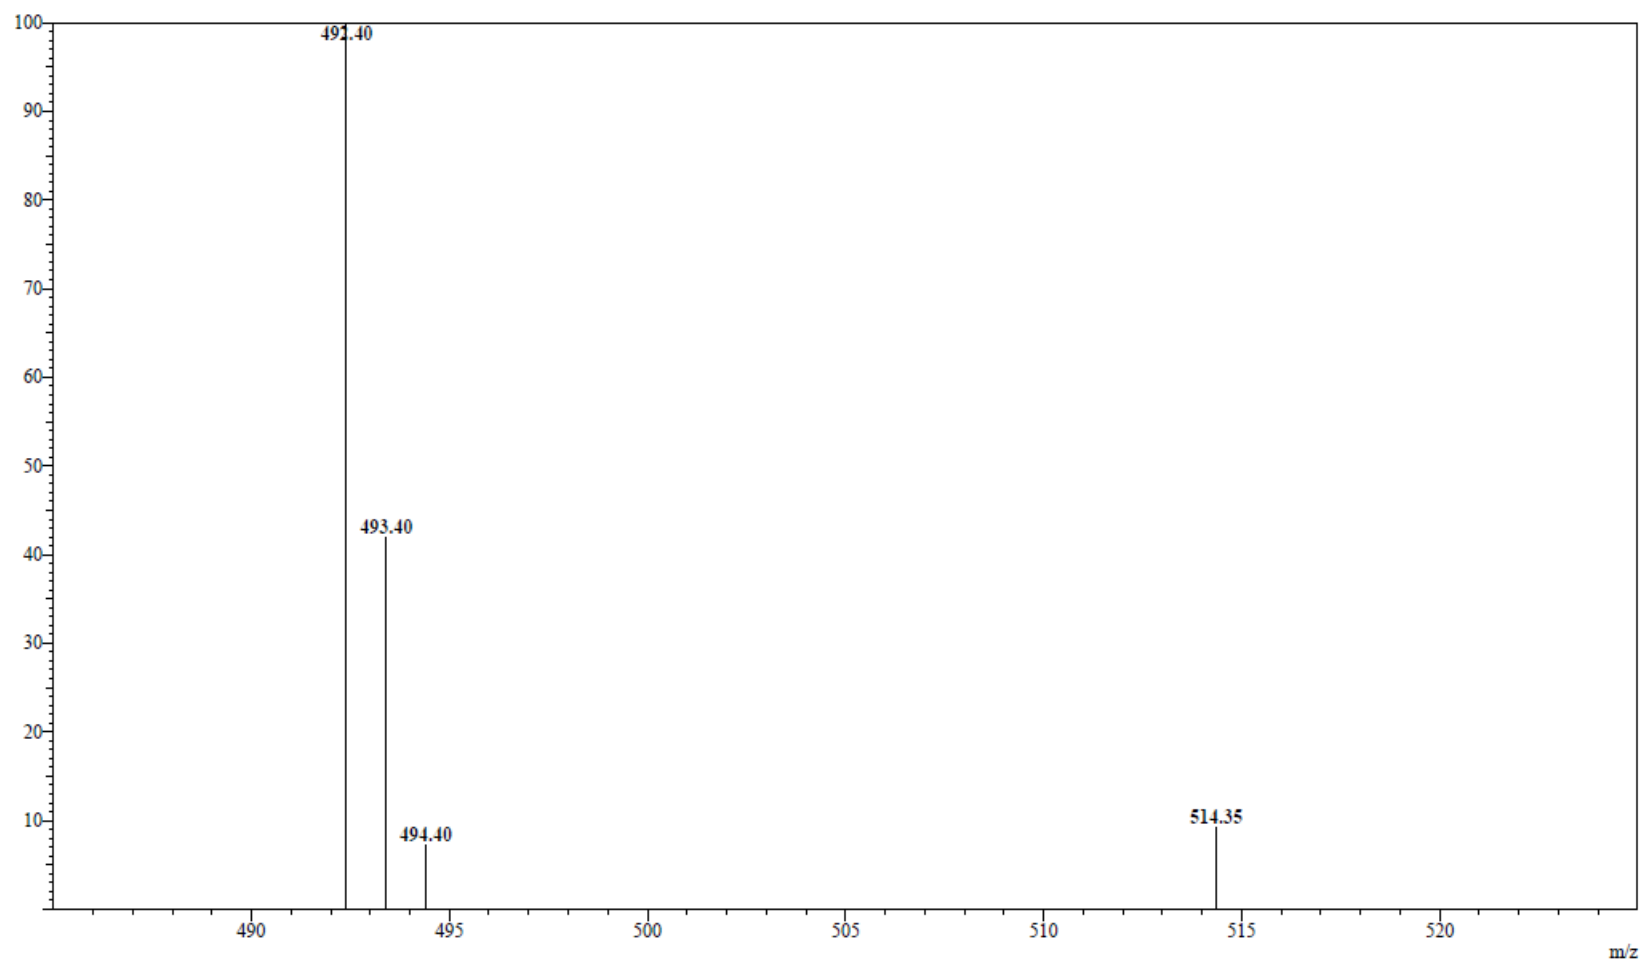



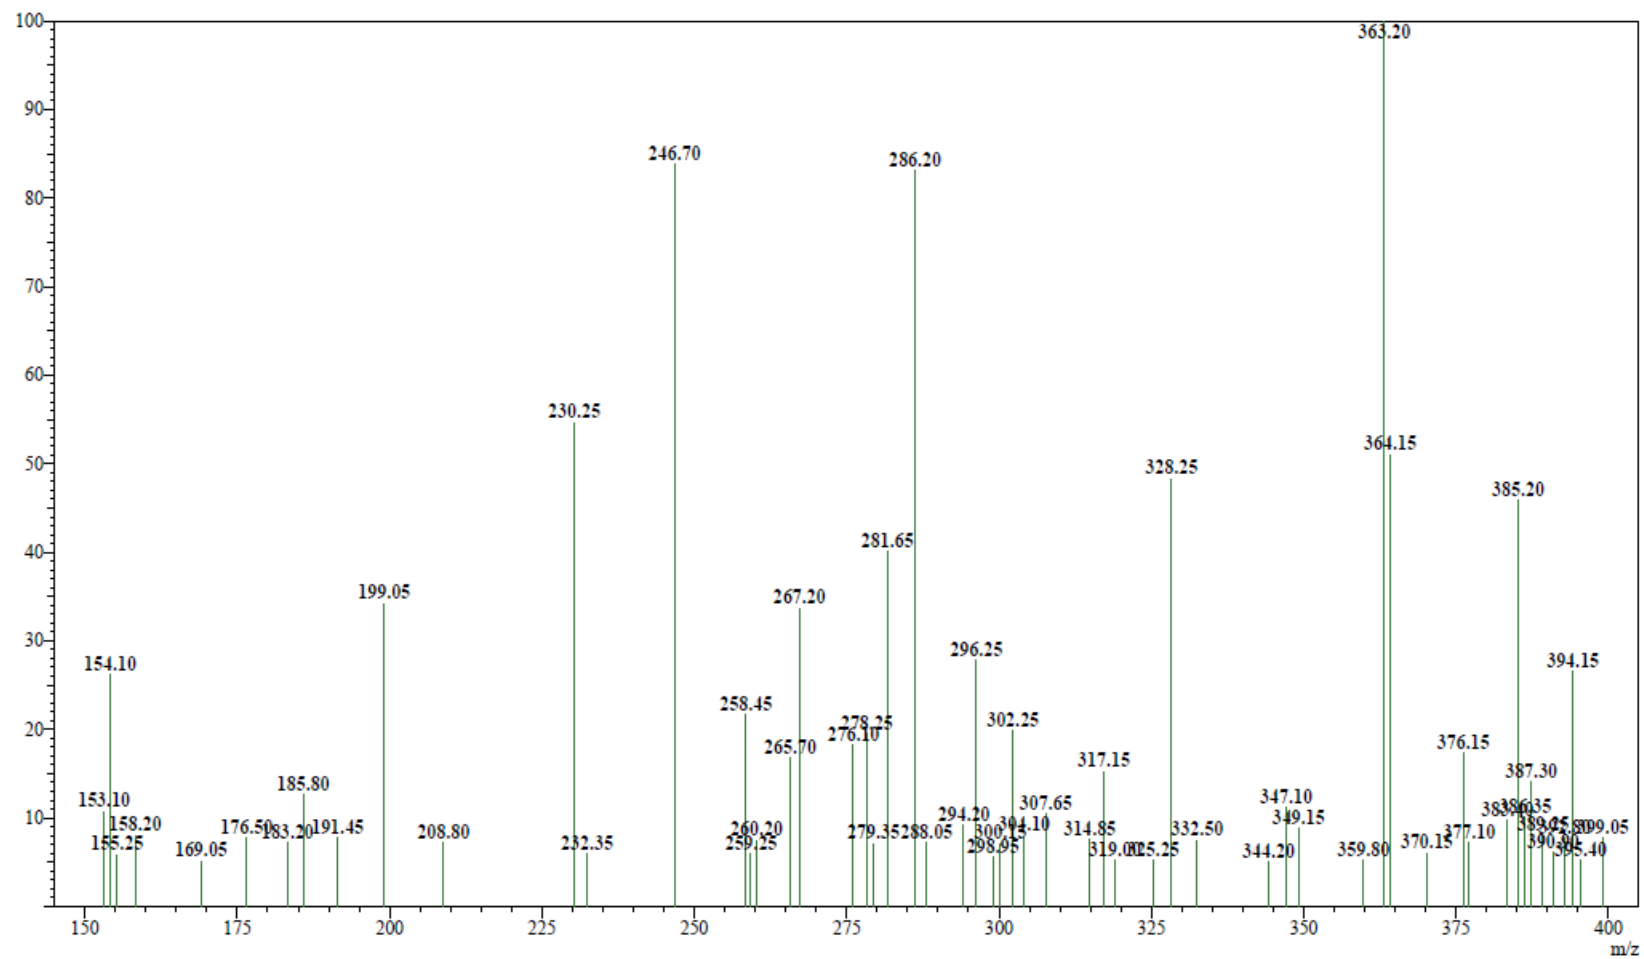

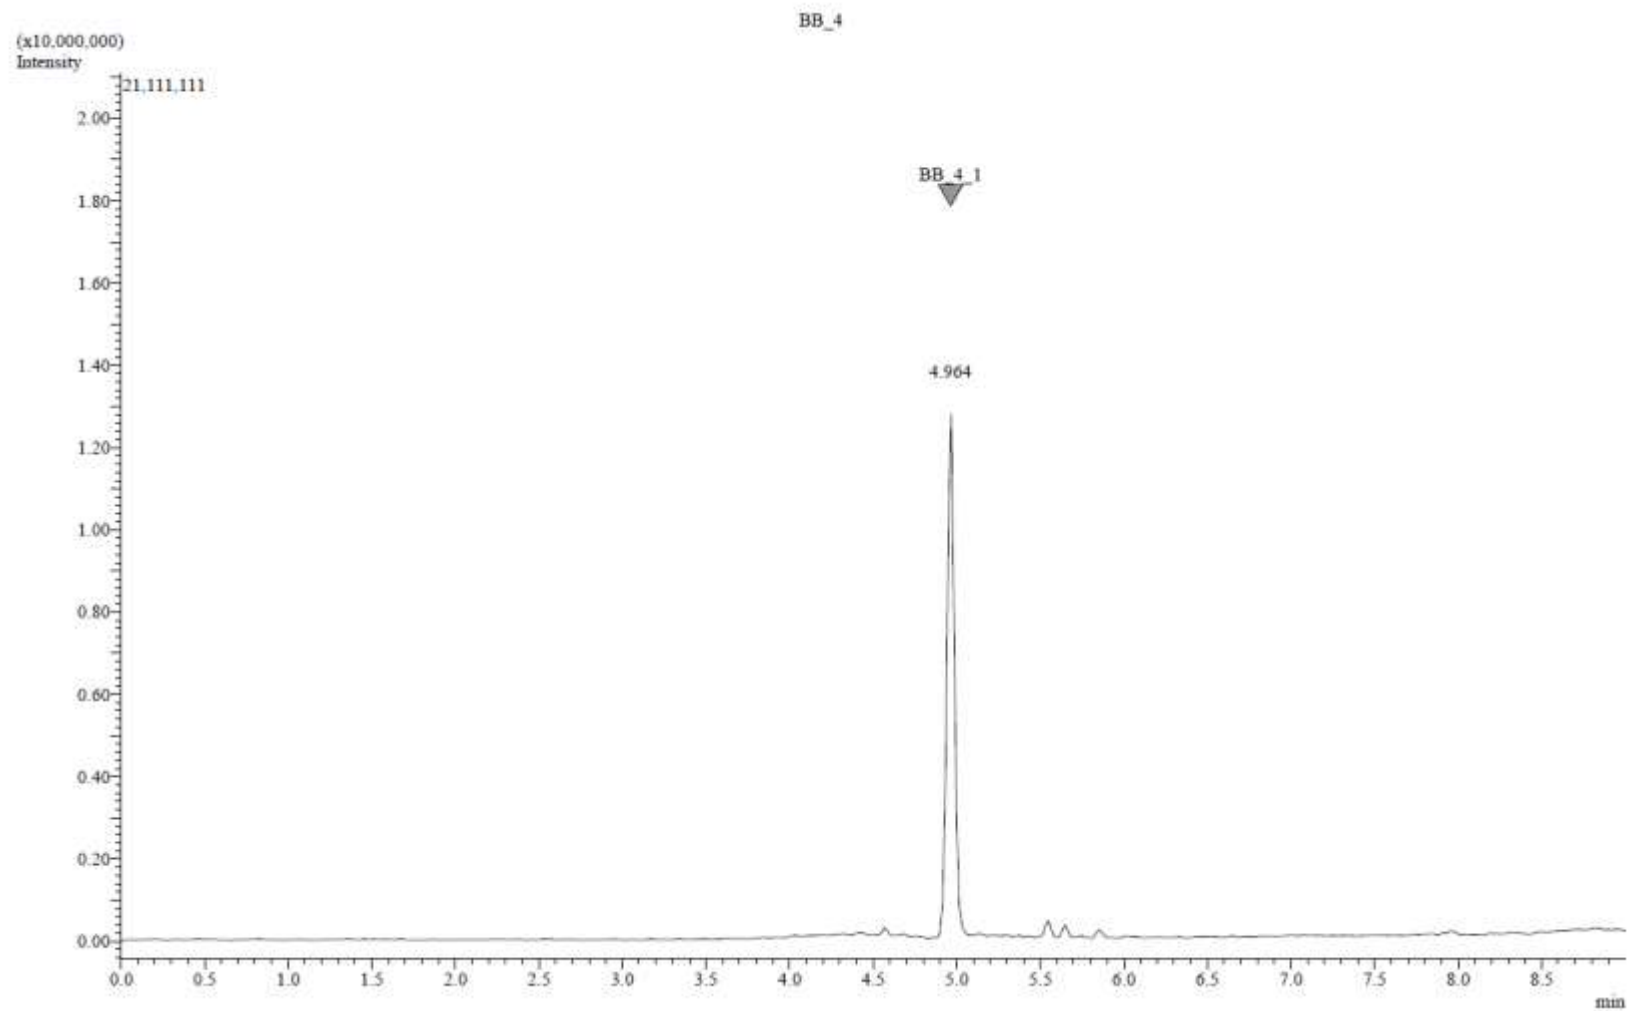

ID# 1 R.Time: 4.950(Scan#: 298)

MS Spectrum

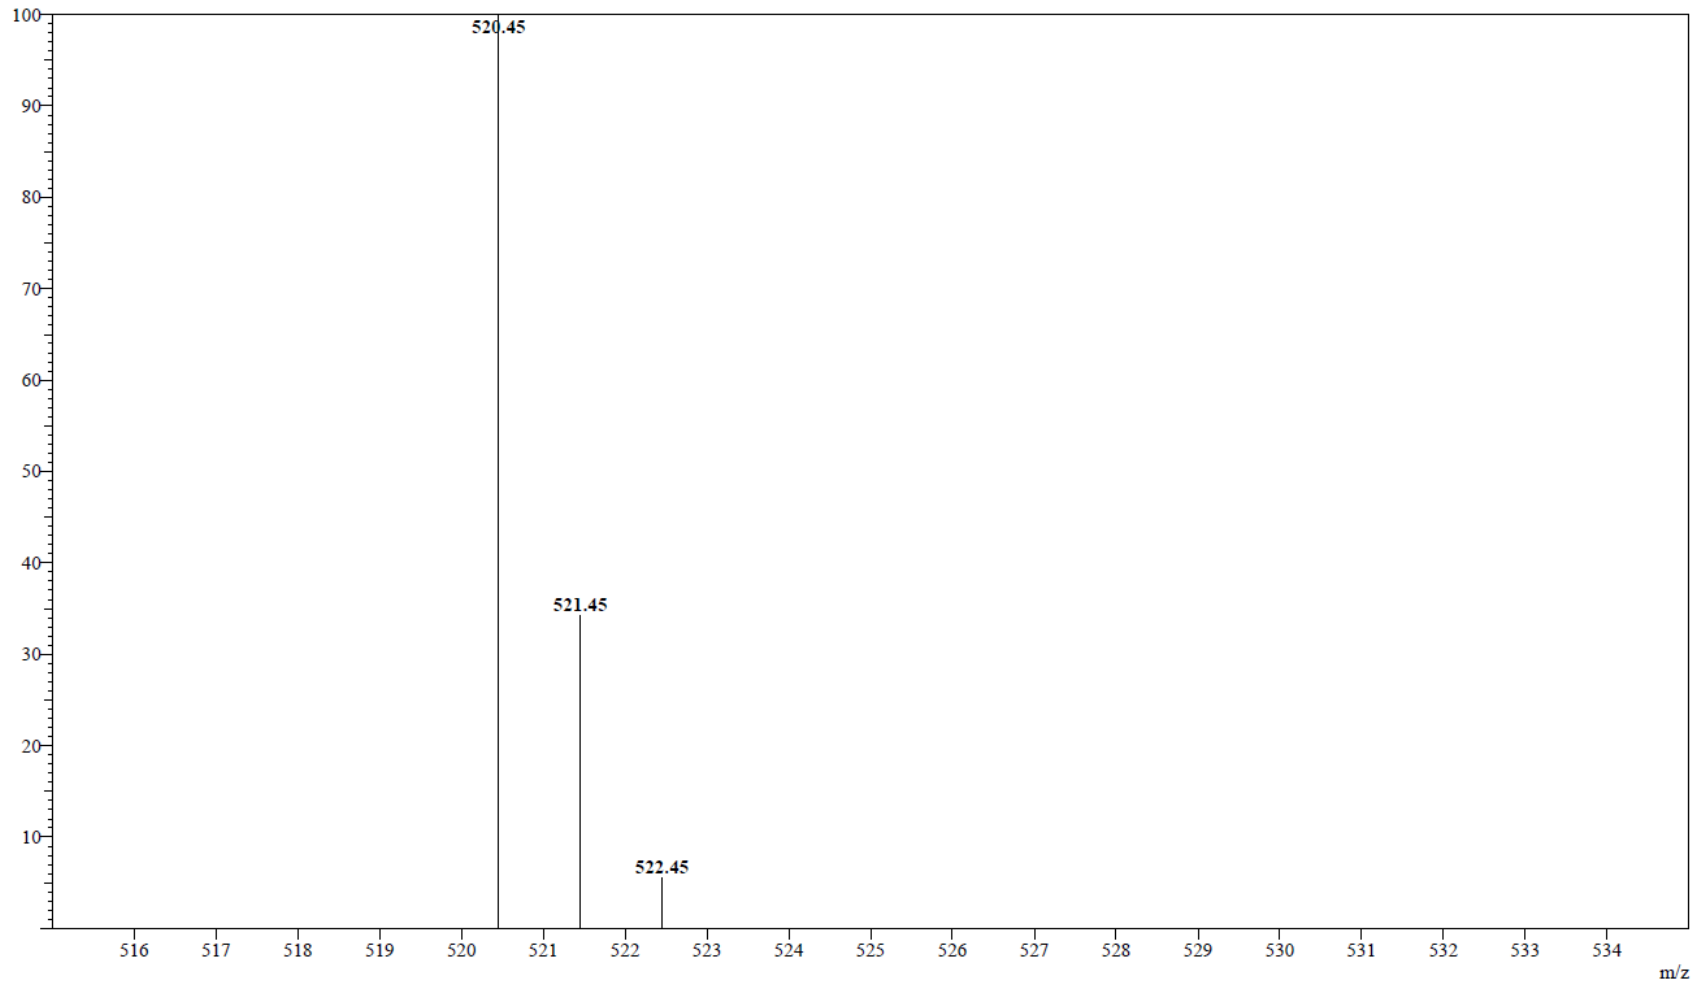

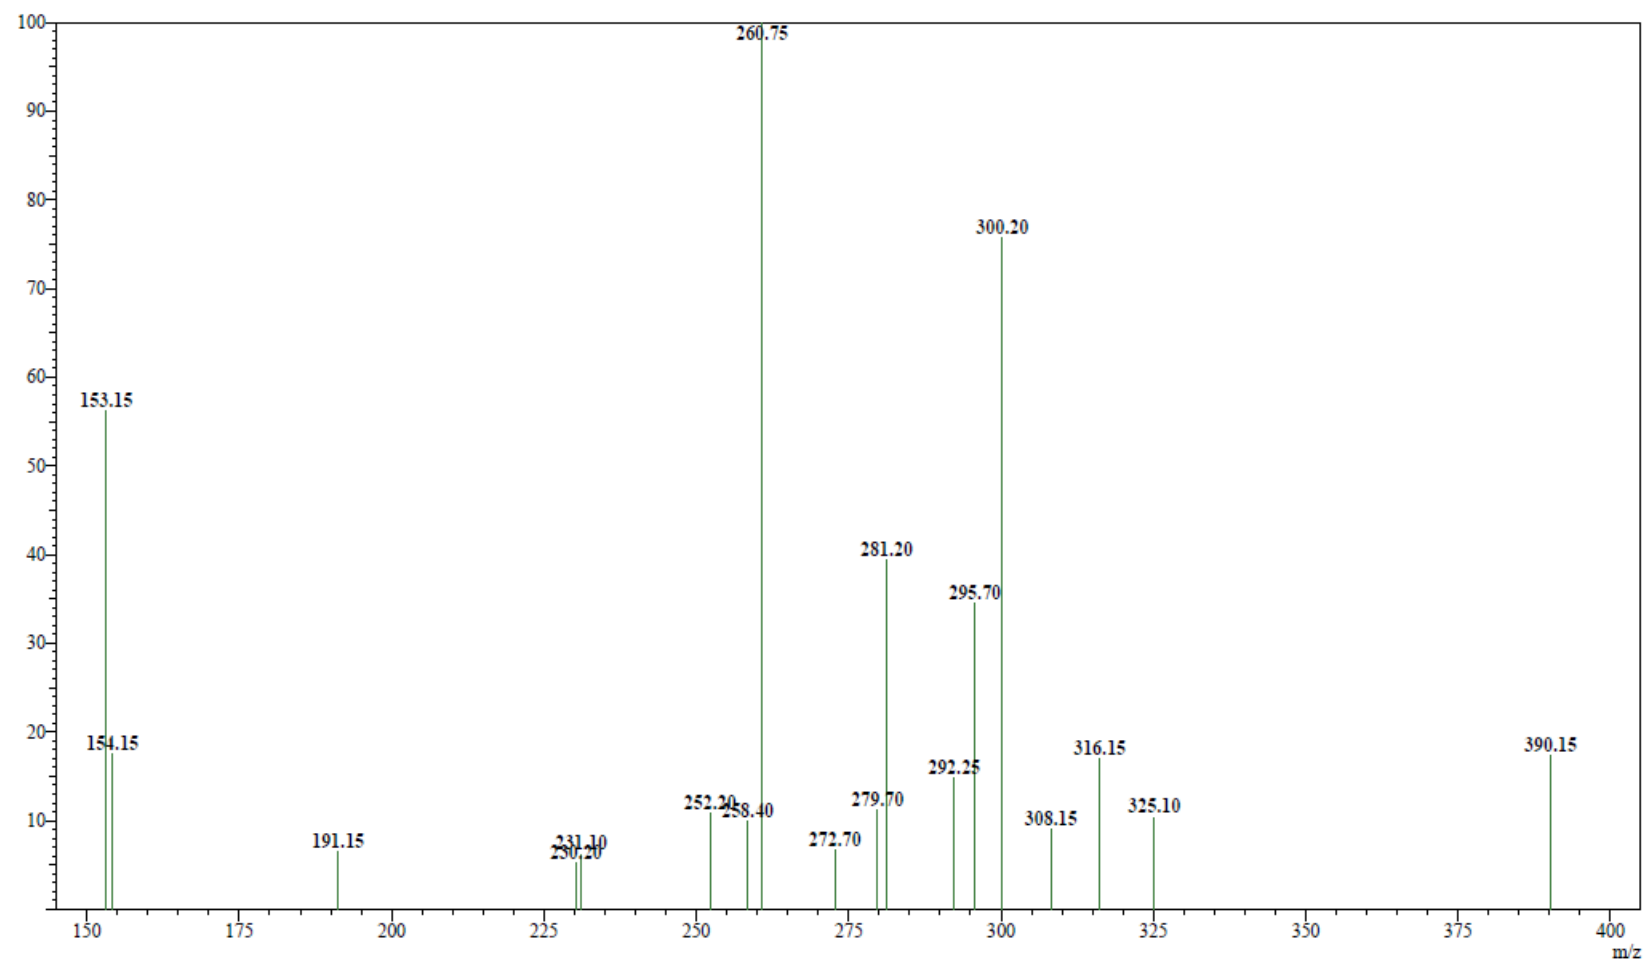

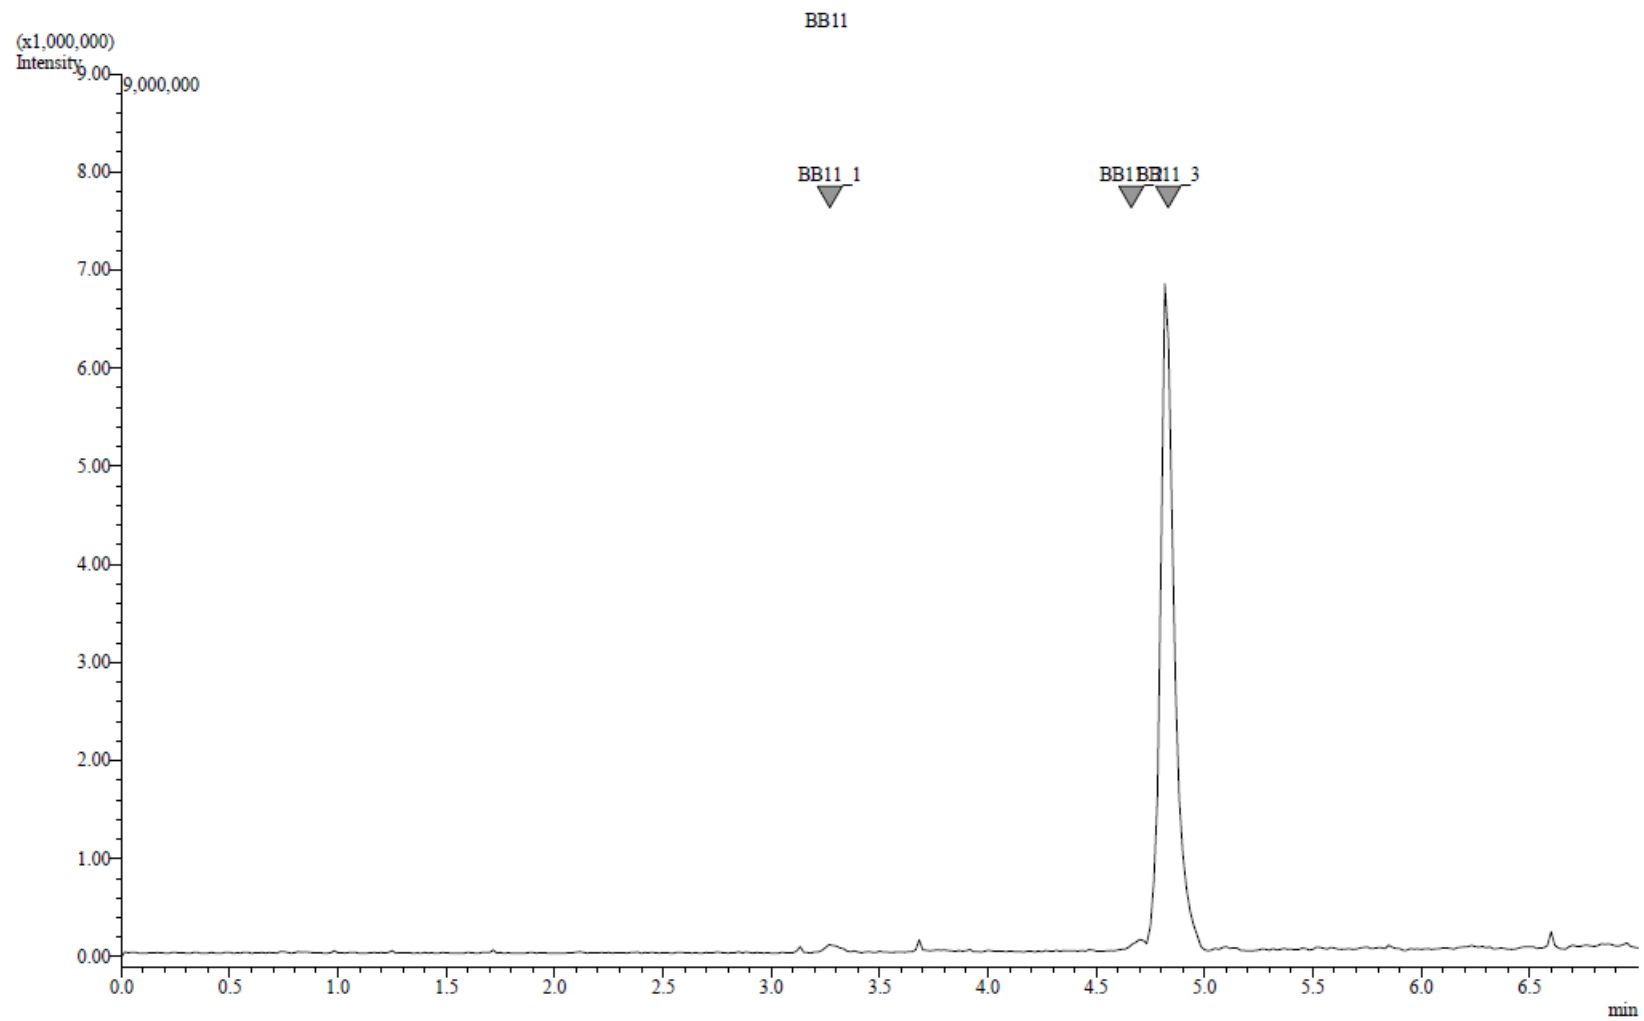

ID# 3 R.Time: 4.817 (Scan#: 290)

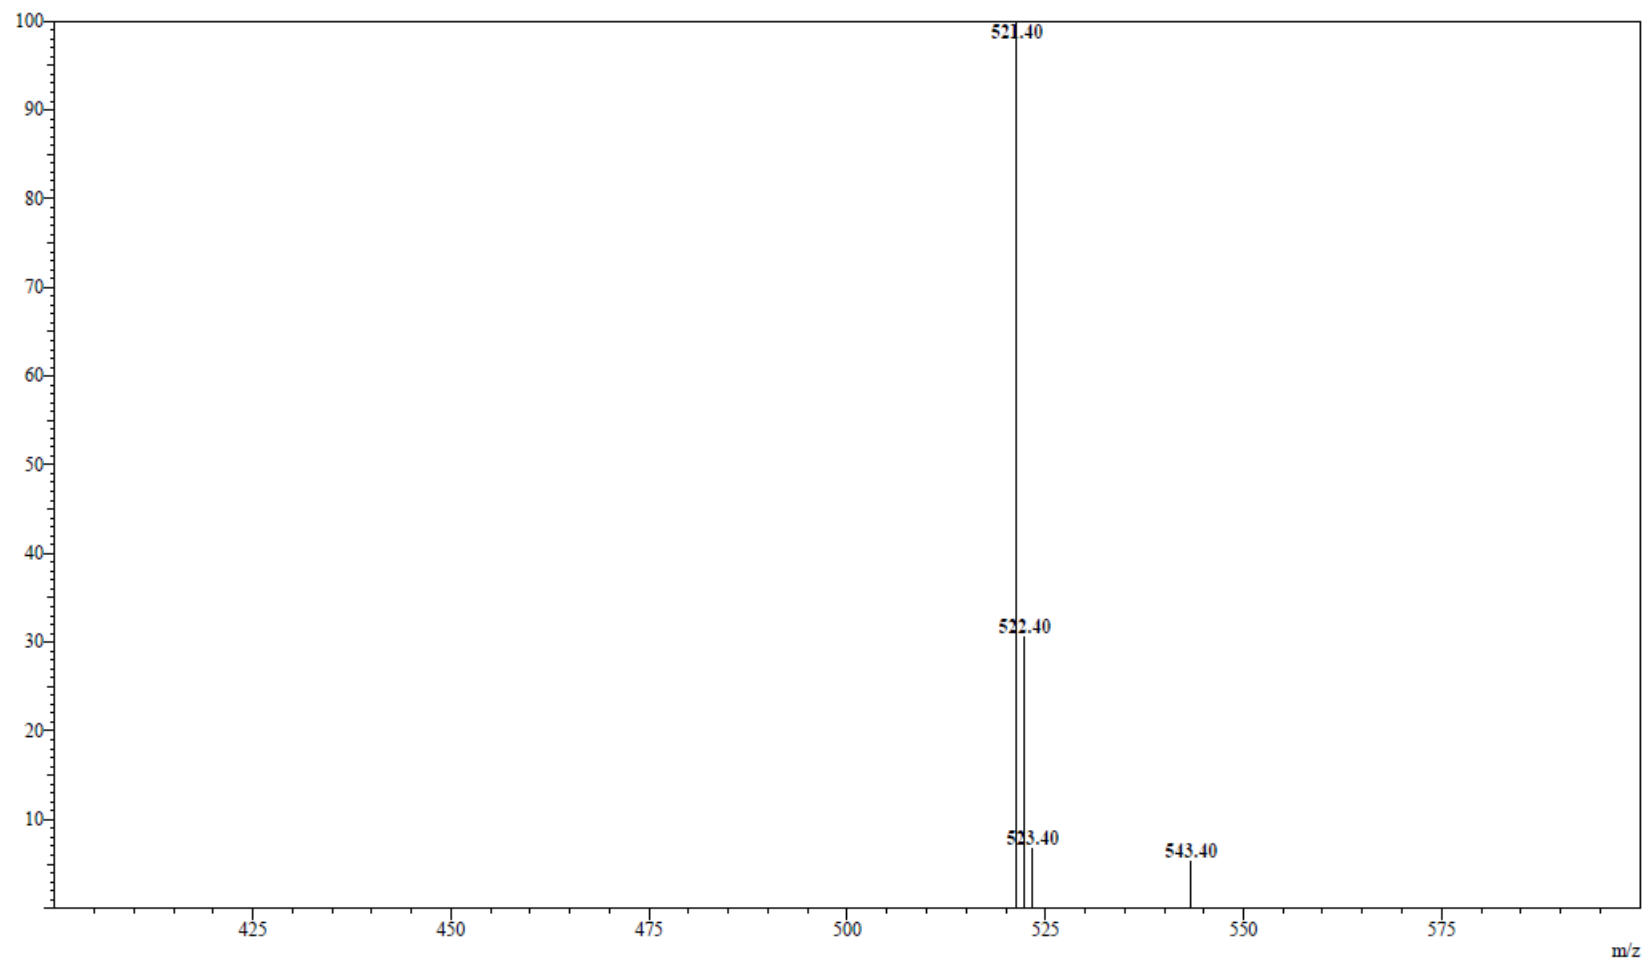

Supplement: s1 [file s1]
